# Supplementary material for: Temporal changes in snow albedo, including the possible effects of red algal growth, in northwest Greenland, simulated with a physically based snow albedo model
Source: Copernicus journal article supplement (doi:10.5194/tc-2019-263), 2019-11-29
Supplement: Supplementary file 1 [file tc-2019-263-supplement.pdf]

## Supplement

**Table S1: Meteorological conditions (10:00 LT) and snow layer depth from mid-June to early August at the study site for the PBSAM.**

| Day of the year | Solar zenith angle (degree) | Solar azimuth (degree) | Ratio of direct and diffuse radiation | Downward shortwave radiation ( $\text{W m}^{-2}$ ) | Snow layer depth (cm) |
|-----------------|-----------------------------|------------------------|---------------------------------------|----------------------------------------------------|-----------------------|
| 168             | 62.8                        | 105.1                  | 0.2                                   | 421.6                                              | 142.0                 |
| 176             | 62.9                        | 104.6                  | 1.0                                   | 268.9                                              | 135.0                 |
| 181             | 63.1                        | 104.4                  | 0.4                                   | 415.1                                              | 110.0                 |
| 190             | 64.0                        | 104.3                  | 0.4                                   | 400.9                                              | 80.0                  |
| 197             | 65.0                        | 104.3                  | 0.7                                   | 330.2                                              | 61.0                  |
| 203             | 66.1                        | 104.5                  | 1.0                                   | 136.8                                              | 44.0                  |
| 209             | 67.4                        | 104.8                  | 0.8                                   | 176.9                                              | 34.0                  |
| 215             | 68.8                        | 105.2                  | 1.0                                   | 84.9                                               | 19.0                  |

**Table S2: Meteorological conditions (11:00 LT) from mid-June to early August at the study site for the PBSAM.**

| Day of the year | Solar zenith angle (degree) | Solar azimuth (degree) | Ratio of direct and diffuse radiation | Downward shortwave radiation ( $\text{W m}^{-2}$ ) |
|-----------------|-----------------------------|------------------------|---------------------------------------|----------------------------------------------------|
| 168             | 59.8                        | 120.4                  | 0.2                                   | 487.1                                              |
| 176             | 59.9                        | 120.0                  | 0.9                                   | 455.2                                              |
| 181             | 60.1                        | 119.7                  | 0.4                                   | 478.8                                              |
| 190             | 61.0                        | 119.5                  | 0.4                                   | 465.8                                              |
| 197             | 62.0                        | 119.5                  | 0.6                                   | 245.3                                              |
| 203             | 63.1                        | 119.7                  | 1.0                                   | 155.7                                              |
| 209             | 64.4                        | 120.0                  | 0.9                                   | 195.8                                              |
| 215             | 65.9                        | 120.4                  | 0.8                                   | 161.6                                              |

**Table S3: Meteorological conditions (12:00 LT) from mid-June to early August at the study site for the PBSAM.**

| Day of the year | Solar zenith angle (degree) | Solar azimuth (degree) | Ratio of direct and diffuse radiation | Downward shortwave radiation ( $\text{W m}^{-2}$ ) |
|-----------------|-----------------------------|------------------------|---------------------------------------|----------------------------------------------------|
| 168             | 57.2                        | 136.3                  | 0.2                                   | 551.7                                              |
| 176             | 57.3                        | 135.8                  | 0.5                                   | 535.4                                              |
| 181             | 57.6                        | 135.6                  | 0.4                                   | 535.4                                              |
| 190             | 58.5                        | 135.3                  | 0.4                                   | 523.6                                              |
| 197             | 59.5                        | 135.3                  | 0.6                                   | 362.0                                              |
| 203             | 60.6                        | 135.4                  | 1.0                                   | 191.0                                              |
| 209             | 61.9                        | 135.6                  | 0.9                                   | 209.9                                              |
| 215             | 63.3                        | 136.0                  | 0.7                                   | 344.3                                              |

**Table S4: Snow properties of the snow surface layer (depth = 0–2 cm) at the study site, derived from snow pit observations and used in the albedo model. The mass concentrations of OC were calculated from observed algal cell concentrations by equation (3). Because mass concentration of MD was not observed on day 168, that on day 168 was assumed to be same as that on day 176.**

| Day of the year | Snow grain size (mm) | Snow water equivalent (kg m <sup>-2</sup> ) | Snow temperature (°C) | Mass concentration of mineral dust (mg L <sup>-1</sup> ) | Mass concentration of black carbon (mg L <sup>-1</sup> ) | Mass concentration of organic carbon (mg L <sup>-1</sup> ) |
|-----------------|----------------------|---------------------------------------------|-----------------------|----------------------------------------------------------|----------------------------------------------------------|------------------------------------------------------------|
| 168             | 0.3                  | 7.7                                         | -0.2                  | 2.7×10 <sup>-1</sup>                                     | 2.1×10 <sup>-3</sup>                                     | 8.3×10 <sup>-2</sup>                                       |
| 176             | 0.6                  | 9.7                                         | -0.1                  | 2.7×10 <sup>-1</sup>                                     | 4.4×10 <sup>-3</sup>                                     | 8.3×10 <sup>-2</sup>                                       |
| 181             | 0.9                  | 7.0                                         | 0.0                   | 1.0                                                      | 7.8×10 <sup>-3</sup>                                     | 8.3×10 <sup>-2</sup>                                       |
| 190             | 0.7                  | 9.4                                         | 0.0                   | 1.5×10                                                   | 2.5×10 <sup>-2</sup>                                     | 8.3×10 <sup>-2</sup>                                       |
| 197             | 0.7                  | 7.0                                         | -0.1                  | 2.1×10                                                   | 3.1×10 <sup>-2</sup>                                     | 8.3×10 <sup>-2</sup>                                       |
| 203             | 0.7                  | 10.4                                        | 0.0                   | 3.7×10                                                   | 1.7×10 <sup>-3</sup>                                     | 8.8×10 <sup>-2</sup>                                       |
| 209             | 0.6                  | 7.4                                         | 0.0                   | 7.1                                                      | 5.4×10 <sup>-5</sup>                                     | 1.5×10 <sup>-1</sup>                                       |
| 215             | 0.9                  | 10.2                                        | 0.0                   | 7.5×10                                                   | 3.7×10 <sup>-3</sup>                                     | 5.1×10 <sup>-1</sup>                                       |

**Table S5: Snow properties of the upper snow subsurface layer (depth = 2–5 cm) at the study site, derived from snow pit observations and used in the albedo model. Snow properties of the lower snow subsurface layer (depth = 5–10 cm) are equivalent to the properties of the upper subsurface layer.**

| Day<br>of the<br>year | Snow<br>grain size<br>(mm) | Snow<br>water<br>equivalent<br>(kg m <sup>-2</sup> ) | Snow<br>temperature<br>(°C) | Mass<br>concentration<br>of mineral<br>dust<br>(mg L <sup>-1</sup> ) | Mass<br>concentration<br>of black<br>carbon<br>(mg L <sup>-1</sup> ) | Mass<br>concentration<br>of organic<br>carbon<br>(mg L <sup>-1</sup> ) |
|-----------------------|----------------------------|------------------------------------------------------|-----------------------------|----------------------------------------------------------------------|----------------------------------------------------------------------|------------------------------------------------------------------------|
| 168                   | 0.5                        | 11.4                                                 | -0.1                        | 3.3×10 <sup>-1</sup>                                                 | 2.3×10 <sup>-5</sup>                                                 | 4.9×10 <sup>-2</sup>                                                   |
| 176                   | 0.8                        | 12.6                                                 | -0.1                        | 3.3×10 <sup>-1</sup>                                                 | 1.0×10 <sup>-4</sup>                                                 | 4.9×10 <sup>-2</sup>                                                   |
| 181                   | 0.4                        | 13.6                                                 | 0.0                         | 3.3×10 <sup>-1</sup>                                                 | 1.0×10 <sup>-3</sup>                                                 | 4.9×10 <sup>-2</sup>                                                   |
| 190                   | 0.7                        | 15.2                                                 | 0.0                         | 6.4×10 <sup>-1</sup>                                                 | 1.2×10 <sup>-5</sup>                                                 | 4.9×10 <sup>-2</sup>                                                   |
| 197                   | 1.0                        | 15.6                                                 | -0.1                        | 7.2                                                                  | 3.5×10 <sup>-5</sup>                                                 | 4.9×10 <sup>-2</sup>                                                   |
| 203                   | 0.8                        | 14.6                                                 | 0.0                         | 2.5                                                                  | 3.3×10 <sup>-3</sup>                                                 | 5.2×10 <sup>-2</sup>                                                   |
| 209                   | 1.1                        | 13.8                                                 | 0.0                         | 2.7×10                                                               | 5.6×10 <sup>-3</sup>                                                 | 8.9×10 <sup>-2</sup>                                                   |
| 215                   | 1.1                        | 15.3                                                 | 0.0                         | 1.4×10                                                               | 1.8×10 <sup>-2</sup>                                                 | 3.0×10 <sup>-1</sup>                                                   |
